# Supplementary material for: Inhibitory effect and mechanism of action (MOA) of hirsutine on the proliferation of T-cell leukemia Jurkat clone E6-1 cells
Source: PeerJ. 2021 Feb 2;9:e10692. doi: 10.7717/peerj.10692 (PMC7863788; doi:10.7717/peerj.10692)
Supplement: Supplemental Information 6 [file peerj-09-10692-s006.xlsx]

## Sheet: Layout
			Plate
				1	2	3	4	5	6	7	8	9	10	11	12
			A
			B		Cmpd1
			C		300 mM	150mM	75mM	37.5mM	18.75mM	9.375mM	4.6875mM	3.90625mM
			D
			E
			F
			G
			H
					Jurkat Clone E6-1 10000cell/孔
					Cpmd1	毛钩藤碱							Neg.Ctrl(1%DMSO)
													10uM STSP
													Blank
					Plate1	24hrs
					Plate2	48hrs
					Plate3	72hrs

## Sheet: Rawdata
	Raw data_Plate1
		1	2	3	4	5	6	7	8	9	10	11	12
	A
	B		0.221	0.205	0.313	0.505	0.67	0.971	0.948	1.031	0.216	0.161
	C		0.225	0.199	0.346	0.561	0.67	0.968	0.983	0.973	0.228	0.159
	D		0.238	0.256	0.331	0.572	0.765	0.983	0.961	0.939	0.22	0.162
	E										1.004
	F										1.07
	G										1.041
	H
	Raw data_Plate2
		1	2	3	4	5	6	7	8	9	10	11	12
	A
	B		0.173	0.153	0.211	0.306	0.759	0.808	0.933	0.971	0.194	0.126
	C		0.197	0.164	0.219	0.313	0.746	0.753	0.862	0.976	0.214	0.124
	D		0.121	0.114	0.15	0.231	0.697	0.767	0.936	1.086	0.176	0.124
	E										1.156
	F										0.909
	G										0.923
	H
	Raw data_Plate3
		1	2	3	4	5	6	7	8	9	10	11	12
	A
	B		0.201	0.205	0.229	0.329	0.682	0.999	1.158	1.103	0.175	0.151
	C		0.188	0.247	0.226	0.316	0.867	1.122	1.21	1.156	0.233	0.142
	D		0.145	0.148	0.188	0.314	0.918	1.078	1.373	1.334	0.244	0.142
	E										1.394
	F										1.289
	G										1.119
	H

## Sheet: Plate1 results
Raw Data_plate1 Jurkat E6-1
	1	2	3	4	5	6	7	8	9	10	11	12
A
B		0.221	0.205	0.313	0.505	0.67	0.971	0.948	1.031	0.216	0.161
C		0.225	0.199	0.346	0.561	0.67	0.968	0.983	0.973	0.228	0.159
D		0.238	0.256	0.331	0.572	0.765	0.983	0.961	0.939	0.22	0.162
E										1.004
F										1.07
G										1.041
H
											Blank
											0.160667
	1	2	3	4	5	6	7	8	9	10	11	12
A
B		0.0603333	0.0443333	0.152333	0.344333	0.509333	0.810333	0.787333	0.870333	0.0553333	0.000333333
C		0.0643333	0.0383333	0.185333	0.400333	0.509333	0.807333	0.822333	0.812333	0.0673333	-0.00166667
D		0.0773333	0.0953333	0.170333	0.411333	0.604333	0.822333	0.800333	0.778333	0.0593333	0.00133333
E										0.843333
F										0.909333
G										0.880333
H
											Neg.Ctrl
											0.877667
Cell growth%
	1	2	3	4	5	6	7	8	9	10	11	12
A
B		6.87429	5.05127	17.3566	39.2328	58.0327	92.3281	89.7076	99.1645	6.3046	0.0379795
C		7.33004	4.36764	21.1166	45.6134	58.0327	91.9863	93.6954	92.556	7.67186	-0.189897
D		8.81124	10.8621	19.4075	46.8667	68.8568	93.6954	91.1888	88.6821	6.76035	0.151918
E										96.0881
F										103.608
G										100.304
H
													Compound ID	IC50
													毛钩藤碱	29.40uM

## Sheet: Plate2 results
Raw Data_plate2 Jurkat E6-1
	1	2	3	4	5	6	7	8	9	10	11	12
A
B		0.173	0.153	0.211	0.306	0.759	0.808	0.933	0.971	0.194	0.126
C		0.197	0.164	0.219	0.313	0.746	0.753	0.862	0.976	0.214	0.124
D		0.121	0.114	0.15	0.231	0.697	0.767	0.936	1.086	0.176	0.124
E										1.156
F										0.909
G										0.923
H
											Blank
											0.124667
	1	2	3	4	5	6	7	8	9	10	11	12
A
B		0.0483333	0.0283333	0.0863333	0.181333	0.634333	0.683333	0.808333	0.846333	0.0693333	0.00133333
C		0.0723333	0.0393333	0.0943333	0.188333	0.621333	0.628333	0.737333	0.851333	0.0893333	-0.000666667
D		-0.00366667	-0.0106667	0.0253333	0.106333	0.572333	0.642333	0.811333	0.961333	0.0513333	-0.000666667
E										1.03133
F										0.784333
G										0.798333
H
											Neg.Ctrl
											0.871333
Cell growth%
	1	2	3	4	5	6	7	8	9	10	11	12
A
B		5.54705	3.25172	9.90819	20.811	72.8003	78.4239	92.7697	97.1308	7.95715	0.153022
C		8.30145	4.51415	10.8263	21.6144	71.3083	72.1117	84.6213	97.7047	10.2525	-0.0765111
D		-0.420811	-1.22418	2.90742	12.2035	65.6848	73.7184	93.114	110.329	5.89135	-0.0765111
E										118.363
F										90.0153
G										91.622
H
													Compound ID	IC50
													毛钩藤碱	24.18mM

## Sheet: Plate3 results
Raw Data_plate3 Jurkat E6-1
	1	2	3	4	5	6	7	8	9	10	11	12
A
B		0.201	0.205	0.229	0.329	0.682	0.999	1.158	1.103	0.175	0.151
C		0.188	0.247	0.226	0.316	0.867	1.122	1.21	1.156	0.233	0.142
D		0.145	0.148	0.188	0.314	0.918	1.078	1.373	1.334	0.244	0.142
E										1.394
F										1.289
G										1.119
H
											Blank
											0.145
	1	2	3	4	5	6	7	8	9	10	11	12
A
B		0.056	0.06	0.084	0.184	0.537	0.854	1.013	0.958	0.03	0.006
C		0.043	0.102	0.081	0.171	0.722	0.977	1.065	1.011	0.088	-0.003
D		0	0.003	0.043	0.169	0.773	0.933	1.228	1.189	0.099	-0.003
E										1.249
F										1.144
G										0.974
H
											Neg.Ctrl
											1.12233
Cell growth%
	1	2	3	4	5	6	7	8	9	10	11	12
A
B		4.9896	5.34601	7.48441	16.3944	47.8467	76.0915	90.2584	85.3579	2.673	0.534601
C		3.8313	9.08821	7.21711	15.2361	64.3303	87.0508	94.8916	90.0802	7.84081	-0.2673
D		0	0.2673	3.8313	15.0579	68.8744	83.1304	109.415	105.94	8.82091	-0.2673
E										111.286
F										101.931
G										86.7835
H
														Compound ID	IC50
														毛钩藤碱	21.33mM

## Sheet: IC50汇总
	Compound ID	24h-IC50	48h-IC50	72h-IC50
	毛钩藤碱	29.40mM	24.18mM	21.33mM

## Sheet: Raw data-Normal cells
		Raw data_Plate1
			1	2	3	4	5	6	7	8	9	10	11	12
		A
		B		0.802	0.943	1.071	1.166
		C		0.889	1.069	1.195	1.29
		D		0.865	1.046	1.209	1.297					1.322
		E										1.269
		F										0.106
		G										0.103
		H
				THLE-2 4000 cells/孔 48hrs
		Raw data_Plate2
			1	2	3	4	5	6	7	8	9	10	11	12
		A
		B		1.282	1.332	1.282	1.266
		C		1.349	1.387	1.375	1.359
		D		1.278	1.353	1.357	1.342					1.354
		E										1.356
		F										0.105
		G										0.102
		H
				HK2 4000 cells/孔 48hrs

## Sheet: Cell toxic  %Control Normal cel
			Cell toxic: %Control
				1	2	3	4	5	6	7	8	9	10	11	12
			A
			B		58.564	70.403	81.15	89.127
			C		65.869	80.982	91.562	99.538
			D		63.854	79.051	92.737	100.126					102.225
			E										97.775
			F										0.126
			G										-0.126
			H
			Cell toxic: %Control
				1	2	3	4	5	6	7	8	9	10	11	12
			A
			B		98.866	103.065	98.866	97.523
			C		104.492	107.683	106.675	105.332
			D		98.531	104.828	105.164	103.904					104.912
			E										105.08
			F										0.125
			G										-0.125
			H
