# Supplementary material for: Inhibitory effect and mechanism of action (MOA) of hirsutine on the proliferation of T-cell leukemia Jurkat clone E6-1 cells
Source: PeerJ. 2021 Feb 2;9:e10692. doi: 10.7717/peerj.10692 (PMC7863788; doi:10.7717/peerj.10692)
Supplement: Supplemental Information 10 [file peerj-09-10692-s010.xlsx]

## Sheet: Q-PCR分析
	DMSO	50μM	25μM	10μM			DMSO	50μM	25μM	10μM						DMSO	50μM	25μM	10μM				DMSO	50μM	25μM	10μM
管家基因GAPDH	19.5037	24.459	23.46	20.4177		管家基因GAPDH	19.5037	24.459	23.46	20.4177					管家基因GAPDH	19.5037	24.459	23.46	20.4177			管家基因GAPDH	19.5037	24.459	23.46	20.4177
	19.1277	24.1057	23.889	20.5923			19.1277	24.1057	23.889	20.5923						19.1277	24.1057	23.889	20.5923				19.1277	24.1057	23.889	20.5923
	19.3617	24.14	23.435	20.4217			19.3617	24.14	23.435	20.4217						19.3617	24.14	23.435	20.4217				19.3617	24.14	23.435	20.4217
BCL-2	25.2103	31.9767	30.0173	26.4463		BAX	24.542	29.538	28.099	25.314					CASP-3	29.5313	33.5743	33.917	31.923			CASP-9	29.263	32.307	32.383	30.085
	24.683	31.927	30.8327	26.3053			24.6877	28.114	28.8877	25.191						30.9863	33.214	33.7847	31.689				28.809	32.092	32.042	30.5383
	25.394	31.6597	29.772	26.1003			24.288	28.7523	27.923	25.559						30.5973	33.1987	33.6187	31.6763				29.287	32.037	32.058	29.8687
Δt	5.70667	7.51767	6.55733	6.02867		Δt	5.03833	5.079	4.639	4.89633					Δt	10.0277	9.11533	10.457	11.5053			Δt	9.75933	7.848	8.923	9.66733
	5.55533	7.82133	6.94367	5.713			5.56	4.00833	4.99867	4.59867						11.8587	9.10833	9.89567	11.0967				9.68133	7.98633	8.153	9.946
	6.03233	7.51967	6.337	5.67867			4.92633	4.61233	4.488	5.13733						11.2357	9.05867	10.1837	11.2547				9.92533	7.897	8.623	9.447
5.76478						5.17489									11.0407							9.78867
ΔΔt	-0.0581118	1.75289	0.792555	0.263888		ΔΔt	-0.136556	-0.0958887	-0.535889	-0.278556					ΔΔt	-1.013	-1.92533	-0.583666	0.464666			ΔΔt	-0.0293333	-1.94067	-0.865668	-0.121334
	-0.209444	2.05655	1.17889	-0.0517782			0.385111	-1.16656	-0.176222	-0.576222						0.818	-1.93233	-1.145	0.0559989				-0.107334	-1.80233	-1.63567	0.157332
	0.267556	1.75489	0.572222	-0.0861111			-0.248556	-0.562556	-0.686889	-0.0375548						0.195001	-1.982	-0.857001	0.213999				0.136667	-1.89167	-1.16567	-0.341667
2-ΔΔt	1.0411	0.296707	0.577321	0.83284		2-ΔΔt	1.09928	1.06872	1.44983	1.21298					2-ΔΔt	2.0181	3.79824	1.49865	0.724639			2-ΔΔt	1.02054	3.83883	1.82218	1.08774
	1.15624	0.240389	0.441692	1.03654			0.76572	2.24475	1.12992	1.49094						0.567228	3.81672	2.21146	0.961928				1.07724	3.48784	3.10731	0.896682
	0.830726	0.296296	0.67258	1.0615			1.18802	1.47688	1.60981	1.02637						0.873572	3.95041	1.81127	0.862144				0.909618	3.71064	2.24337	1.26722
mean	1.00936	0.277798	0.563864	0.976962		mean	1.01767	1.59679	1.39652	1.24343					mean	1.15297	3.85512	1.84046	0.84957			mean	1.00246	3.6791	2.39095	1.08388
SD	0.165064	0.0323971	0.116031	0.125436		SD	0.222662	0.597112	0.244346	0.233776					SD	0.764727	0.083032	0.3573	0.119143			SD	0.0852581	0.177608	0.655153	0.185299
